# Supplementary material for: Efficacy and safety of alpha lipoic acid-capped silver nanoparticles for oral applications
Source: RSC Adv. 2019 Feb 28;9(12):6973–85. doi: 10.1039/c9ra00613c (PMC9061105; doi:10.1039/c9ra00613c)
Supplement: RA-009-C9RA00613C-s001 [file RA-009-C9RA00613C-s001.pdf]

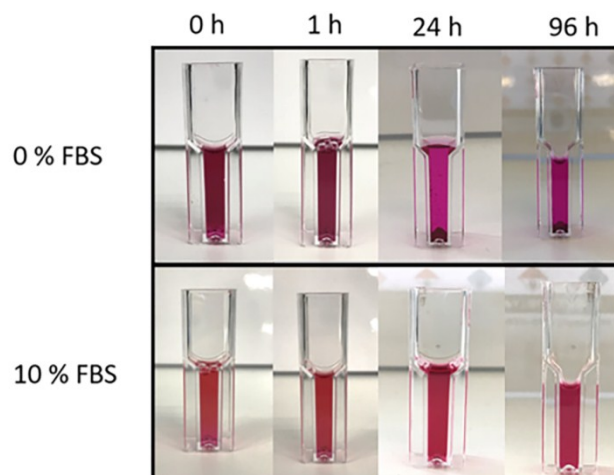

Supplementary Figure S1. Visual sedimentation of AgNPs dispersed in DMEM/0% FBS over 96 h and FBS mediated stabilization of AgNPs in DMEM/10% FBS.

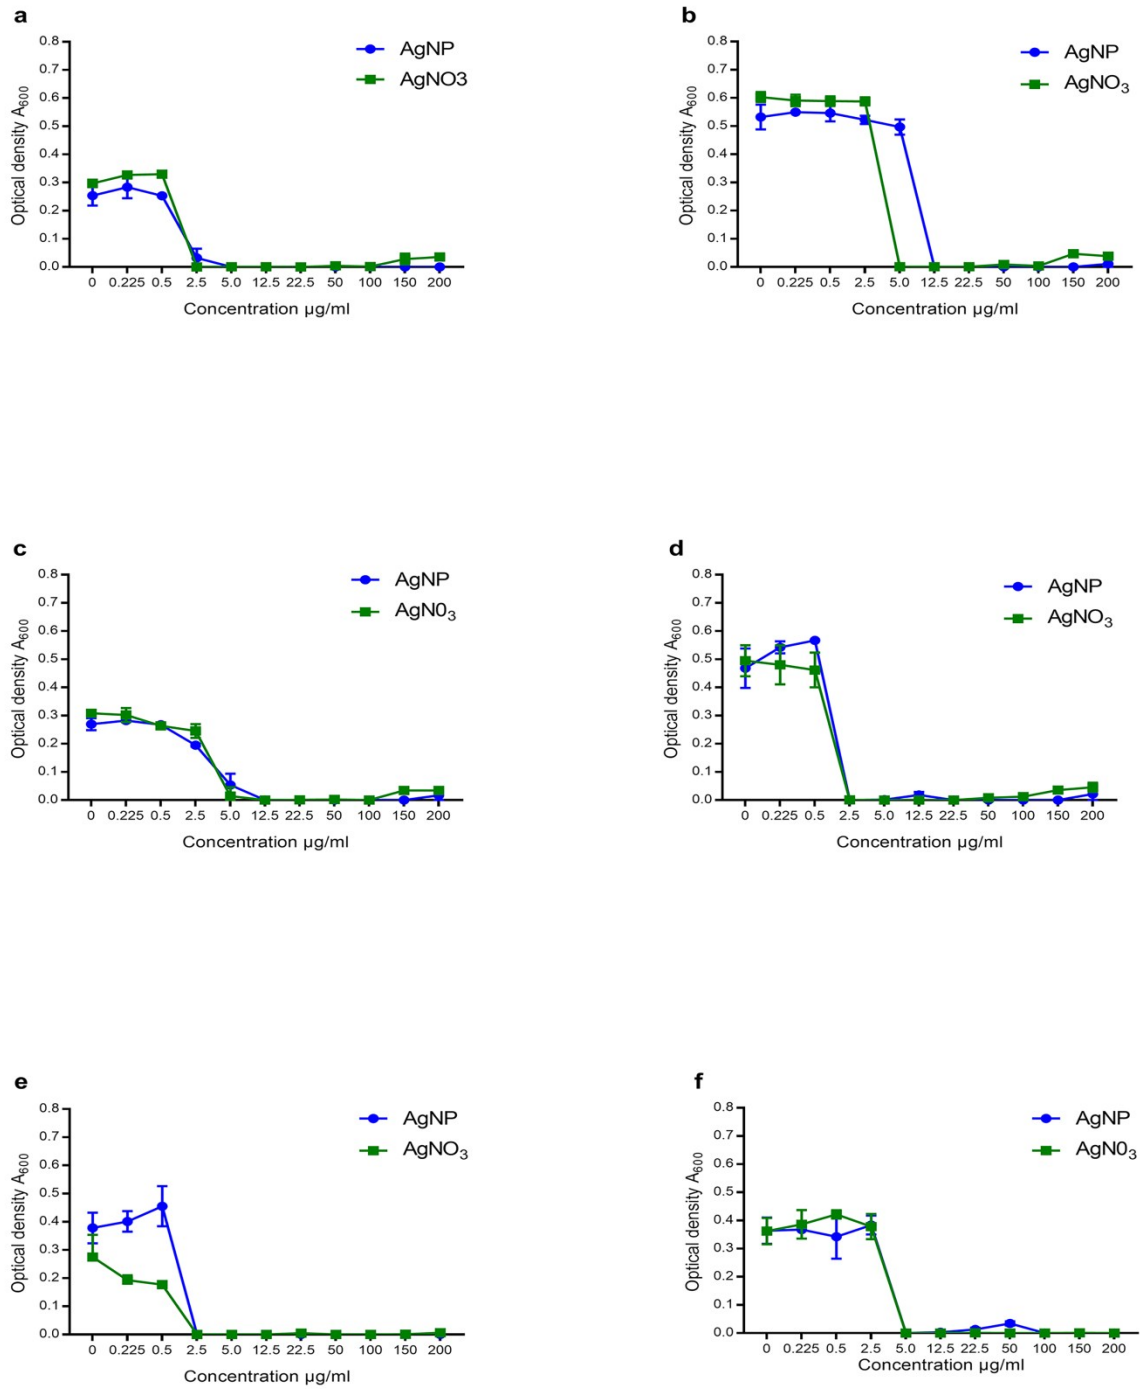

Supplementary Figure S2. Minimal inhibitory concentration, determined by optical density ( $A_{600}$ ), of increasing AgNP concentration on (a) *E. coli* (b) *S. aureus* (c) *P. aeruginosa* (d) *S. mutans* (e) *S. mitis* (f) *S. gordonii*.

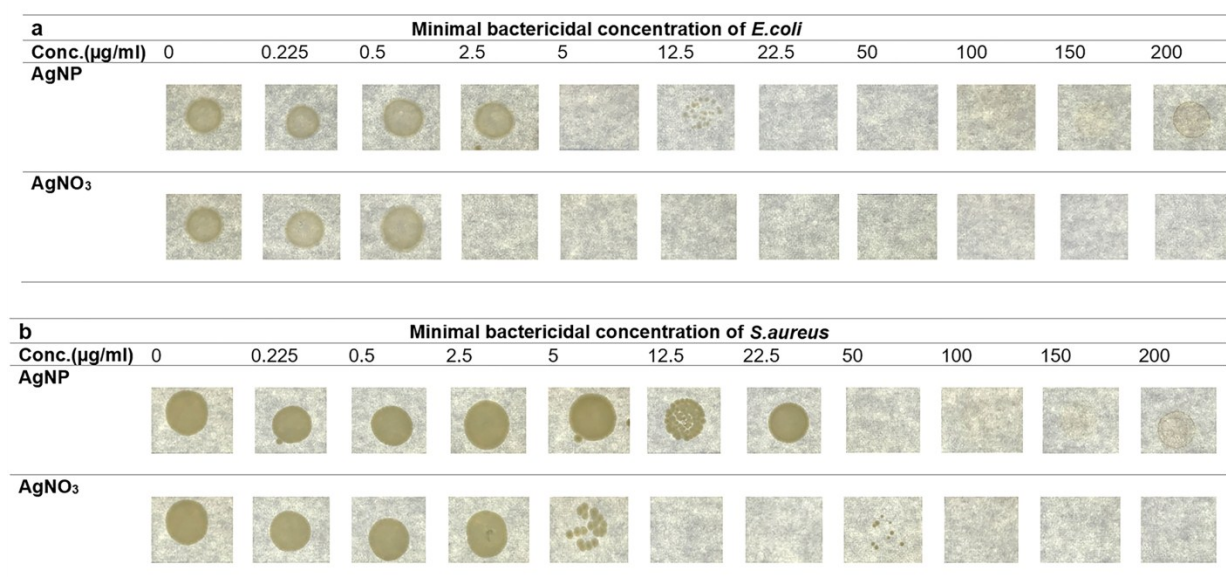

Supplementary Figure S3. Minimal bactericidal concentration, determined by re-plating bacterial cultures subjected to increasing AgNP concentration post 24 h incubation (a) *E.coli* (b) *S.aureus*

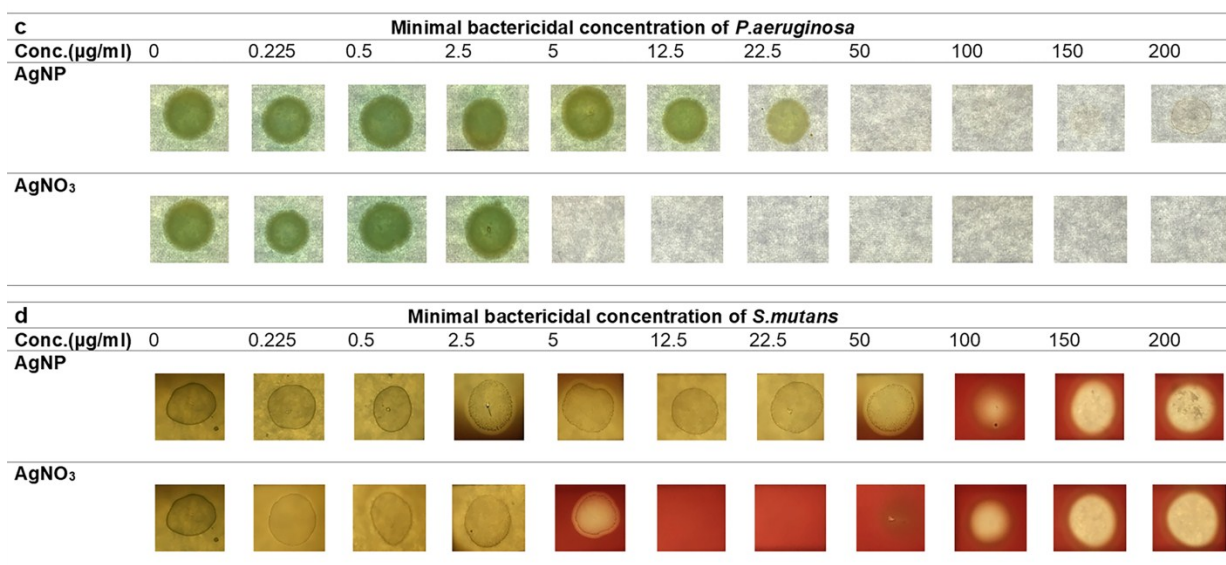

Supplementary Figure S3. Minimal bactericidal concentration, determined by re-plating bacterial cultures subjected to increasing AgNP concentration post 24 h incubation (c) *P.aeruginosa* (d) *S.mutans*.

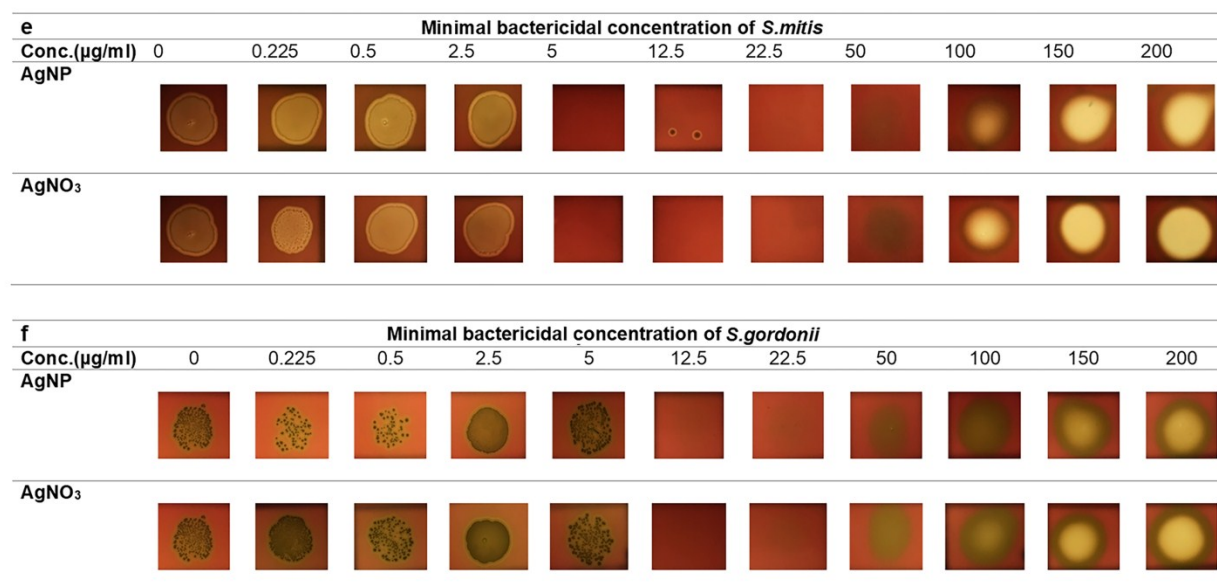

Supplementary Figure S3. Minimal bactericidal concentration, determined by re-plating bacterial cultures subjected to increasing AgNP concentration post 24 h incubation (e) *S.mitis* (f) *S.gordonii*.

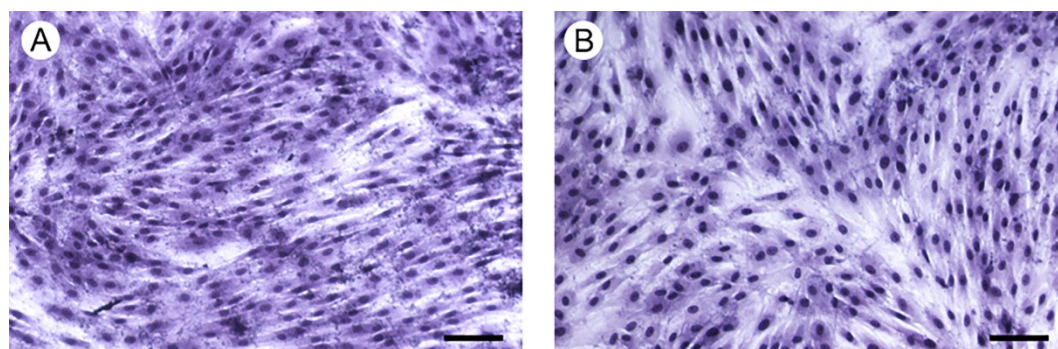

Supplementary Figure S4. Light microscopy images of the cellular morphology of control HGF cells at 96 h (a) cells in DMEM/10% FBS media (b) cells with 22.5 µg/mL alkaline DI-H<sub>2</sub>O (pH10.01). Scale bar = 100 µm.

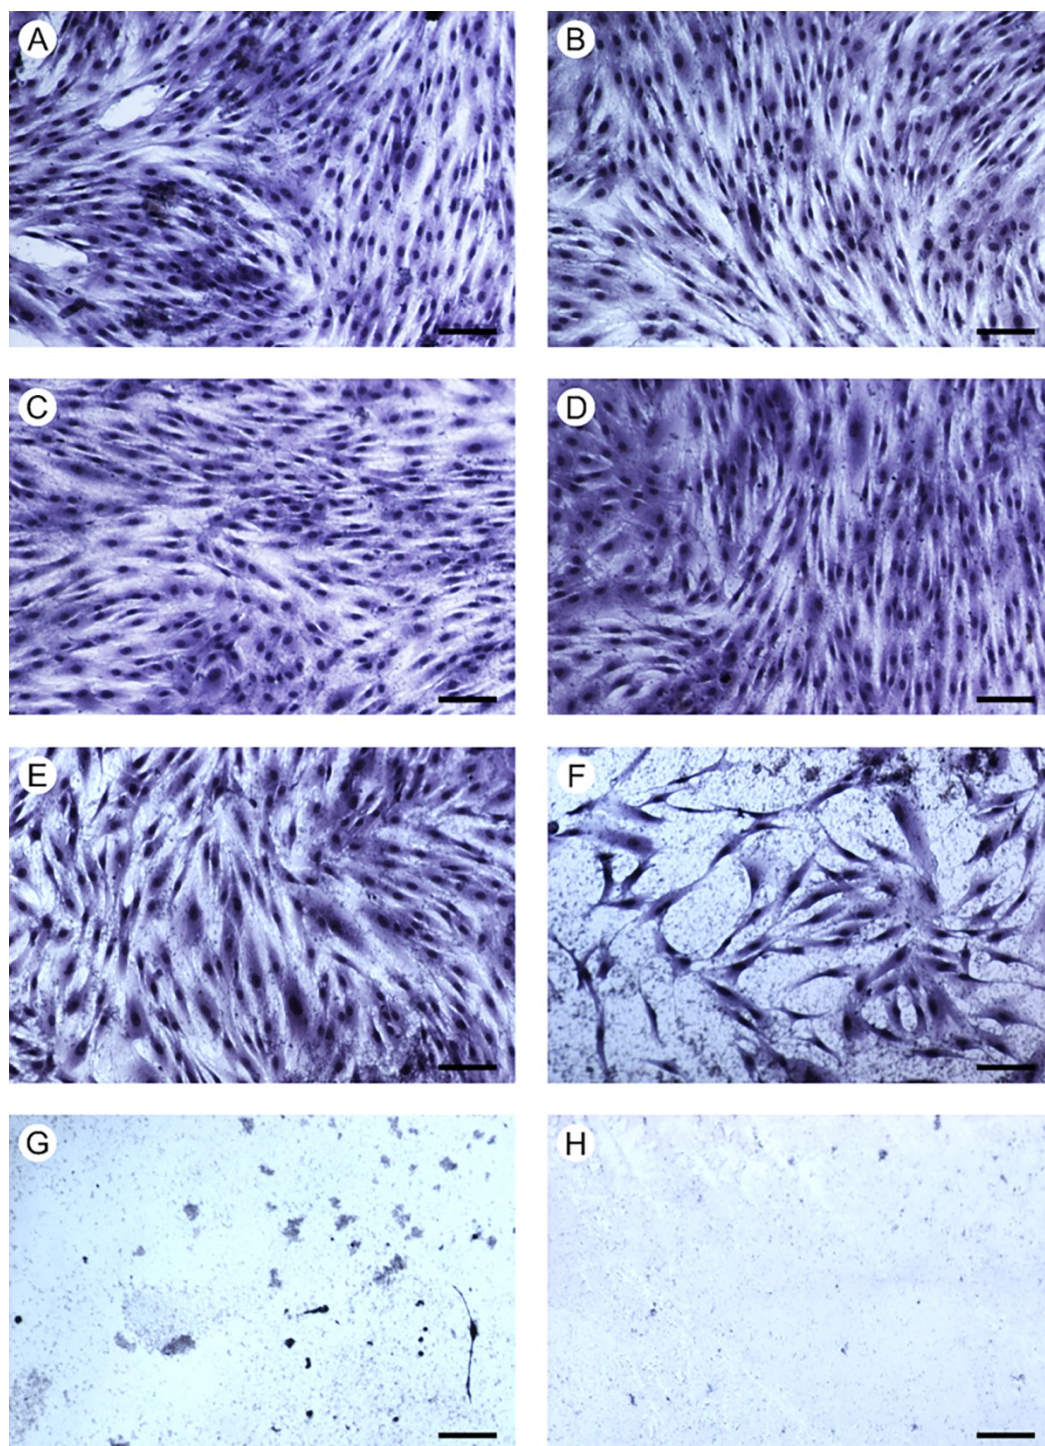

Supplementary Figure S5. Light microscopy images of the cellular morphology of HGF cells treated with AgNPs at 96 h (a) 0.0225 (b) 0.05 (c) 0.225 (d) 0.5 (e) 2.25 (f) 5 (g) 22.5 (h) 50  $\mu\text{g/mL}$ . Scale bar = 100  $\mu\text{m}$ .

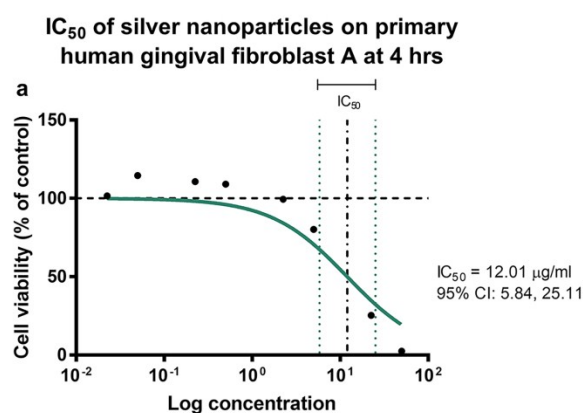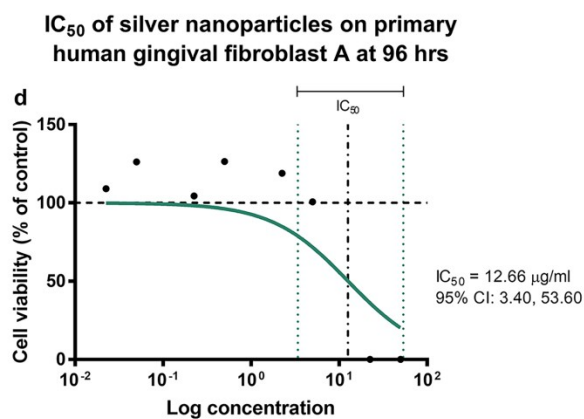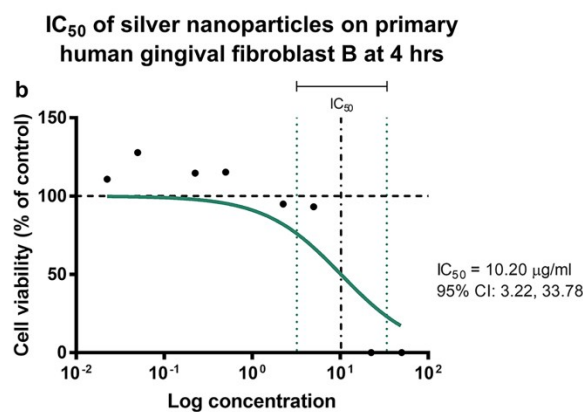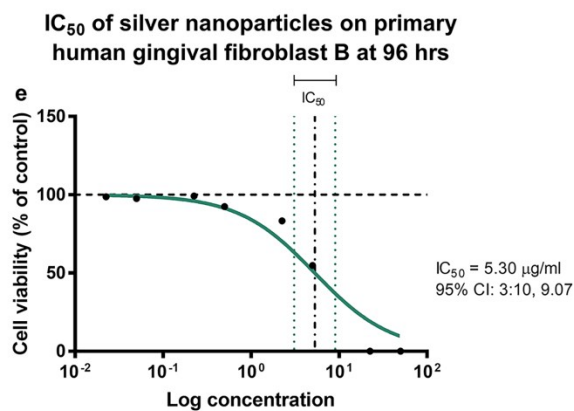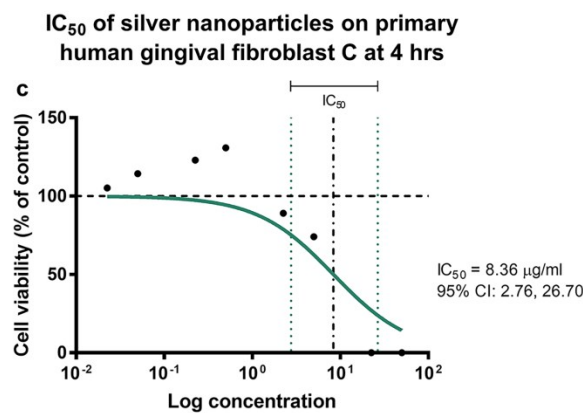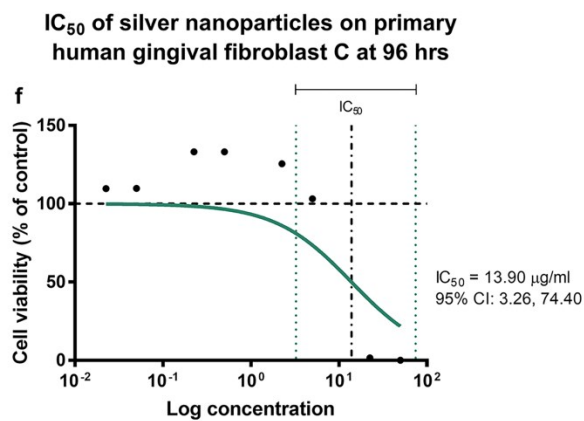

Supplementary Figure S6. Half maximal inhibitory concentration (IC<sub>50</sub>) of AgNPs on HGF-1 at (a) 4 h (b) 96 h, HGF-2 at (c) 4 h (d) 96 h, HGF-3 at (e) 4 h (f) 96 h.
